# Supplementary material for: Asymmetric functional contributions of acidic and aromatic side chains in sodium channel voltage-sensor domains
Source: PubMed Central journal article supplement — J Gen Physiol. 2014 May;143(5):645–56. doi: 10.1085/jgp.201311036 (PMC4003186; doi:10.1085/jgp.201311036), 2014-05
Supplement: supp_jgp.201311036_JGP_201311036_sm.pdf [file supp_jgp.201311036_JGP_201311036_sm.pdf]

Pless et al., <http://www.jgp.org/cgi/content/full/jgp.201311036/DC1>

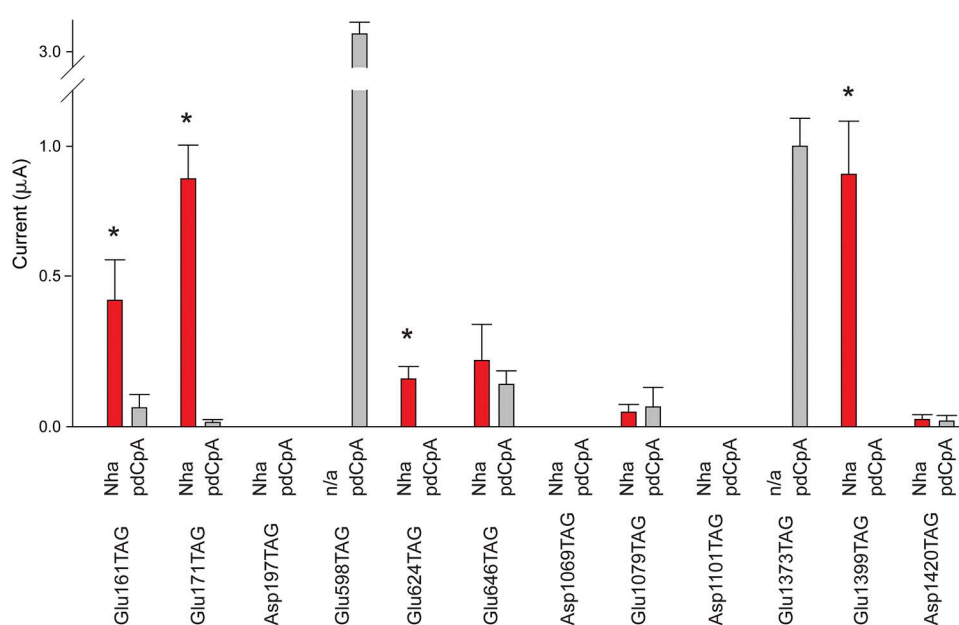

**Figure S1.** Analysis of Nha incorporation. Bar graph showing the average current size observed when TAG stop codons replaced the codons for acidic residues in S2 and S3 in Nav1.4; red bars show average current sizes after coinjection of Nav1.4-TAG mRNA with (Nha)-acylated tRNA (Nha-pdCpA-tRNA; abbreviated as Nha in the figure), and gray bars show current sizes obtained after coinjection of Nav1.4-TAG mRNA with pdCpA-tRNA lacking a conjugated amino acid (abbreviated as pdCpA in the figure). \*, statistical difference to values obtained with pdCpA in an unpaired *t* test ( $P < 0.05$ ). Note that Glu624TAG elicited currents when injected with Nha-coupled tRNA but not amino acid-free tRNA. However, given the limiting rescued current size obtained with Nha-pdCpA-tRNA (<200 nA), this substitution was not characterized but instead the conventional Glu624Gln mutant was analyzed (see Fig. 2). Furthermore, Glu598TAG and Glu1373TAG generated large currents in the presence of pdCpA-tRNA lacking a conjugated amino acid and were thus not further investigated. Note the break in the y axis.
